# Supplementary material for: Enteric Ganglioneuritis, a Common Feature in a Subcutaneous TBEV Murine Infection Model
Source: MDPI journal article supplement (doi:10.3390/microorganisms9040875), 2021-04-18

#### Supplementary Materials:

Tab. S1 Overview of TBEV-RNA copies/500 µl homogenate (sample: size of a rice grain) as determined by RT-qPCR in the small intestine and cerebrum of mice subcutaneously infected with  $10^3$  TCID<sub>50</sub>/ml of TBEV Neudoerfl strain. M1-M3 were medium injected negative controls while M29 and M30 were intracerebral infected positive control mice. (dpi, day of euthanasia after TBEV-infection).

Tab. S2: Overview of TBEV-RNA copies/500 µl homogenate (sample: size of a rice grain) as determined by RT-qPCR in the small intestine, cerebrum and cerebellum of mice orally infected with  $10^3$  TCID<sub>50</sub>/ml of TBEV Neudoerfl strain and histological findings within the brain. M1-M3 were medium injected negative control mice. (dpi, day of euthanasia after TBEV-infection).

Fig S1 Clinical Score sheet used for TBEV murine infection model.

Fig. S2 Ratio ( $2^{\Delta\Delta C_q}$ ) of  $C_q$  values of TBEV RNA copies/5 µl vs  $\beta$ -actin copies /5 µl of small intestine, spinal cord, cerebrum and cerebellum representing the relative expression differences over the course of infection. The spleen TBEV and  $\beta$ -actin RNA copies for each animal were used as reference organ.

**Tab. S1** Overview of TBEV-RNA copies/500 µl homogenate (sample: size of a rice grain) as determined by RT-qPCR in the small intestine and cerebrum of mice subcutaneously infected with  $10^3$  TCID<sub>50</sub>/ml of TBEV Neudoerfl strain. M1-M3 were medium injected negative controls while M29 and M30 were intracerebrally infected positive control mice. (dpi, day of euthanasia after TBEV-infection).

| Animal ID | dpi | TBEV RNA copies<br>in intestine | TBEV RNA copies<br>in cerebrum |
|-----------|-----|---------------------------------|--------------------------------|
| M4        | 0   | Negative                        | Negative                       |
| M5        | 0   | Negative                        | Negative                       |
| M6        | 0   | Negative                        | Negative                       |
| M7        | 2   | Negative                        | Negative                       |
| M8        | 2   | Negative                        | Negative                       |
| M9        | 2   | Negative                        | Negative                       |
| M10       | 4   | $5.19 * 10^3$                   | Negative                       |
| M11       | 4   | Negative                        | Negative                       |
| M12       | 4   | $5.25 * 10^2$                   | Negative                       |
| M14       | 7   | $1.06 * 10^4$                   | $6.17 * 10^4$                  |
| M15       | 7   | $1.75 * 10^7$                   | $4.63 * 10^6$                  |
| M28       | 7   | $3.15 * 10^4$                   | $9.28 * 10^6$                  |
| M24       | 8   | $1.52 * 10^6$                   | $1.59 * 10^9$                  |
| M25       | 8   | $2.12 * 10^6$                   | $6.13 * 10^9$                  |
| M26       | 8   | $1.23 * 10^6$                   | $2.71 * 10^8$                  |
| M18       | 9   | $1.27 * 10^6$                   | $3.53 * 10^9$                  |
| M19       | 9   | $1.00 * 10^6$                   | $1.74 * 10^9$                  |
| M17       | 10  | $6.9 * 10^5$                    | $7.32 * 10^9$                  |
| M22       | 10  | $7.08 * 10^5$                   | $3.27 * 10^9$                  |
| M27       | 10  | $9.22 * 10^5$                   | $6.89 * 10^8$                  |
| M21       | 11  | $2.12 * 10^5$                   | $3.83 * 10^8$                  |
| M20       | 12  | $3.65 * 10^5$                   | $1.08 * 10^9$                  |
| M23       | 12  | $5.99 * 10^5$                   | $1.81 * 10^9$                  |
| M16       | 14  | Negative                        | Negative                       |
| M1        | 14  | Negative                        | Negative                       |
| M2        | 14  | Negative                        | Negative                       |
| M3        | 14  | Negative                        | Negative                       |
| M29       | 6   | $3.04 * 10^7$                   | $2.362 * 10^{10}$              |
| M30       | 6   | $1.83 * 10^7$                   | $2,34 * 10^{10}$               |

**Tab. S2.** Overview of TBEV-RNA copies/500 µl homogenate (sample: size of a rice grain) as determined by RT-qPCR in the small intestine, cerebrum and cerebellum of mice orally infected with 10<sup>3</sup> TCID50/ml of TBEV Neudoerfl strain and histological findings within the brain. M1-M3 were medium injected negative control mice. (dpi, day of euthanasia after TBEV-infection).

| Animal ID | dpi | TBEV RNA copies<br>in intestine | TBEV RNA copies<br>in cerebrum | TBEV RNA copies<br>in cerebellum | Histological<br>findings within the<br>brain |
|-----------|-----|---------------------------------|--------------------------------|----------------------------------|----------------------------------------------|
| Mo4       | 0   | Negative                        | Negative                       | Negative                         | Negative                                     |
| Mo5       | 0   | Negative                        | Negative                       | Negative                         | Negative                                     |
| Mo6       | 0   | Negative                        | Negative                       | Negative                         | Negative                                     |
| Mo7       | 2   | Negative                        | Negative                       | Negative                         | Negative                                     |
| Mo8       | 2   | Negative                        | Negative                       | Negative                         | Negative                                     |
| Mo9       | 2   | Negative                        | Negative                       | Negative                         | Negative                                     |
| Mo10      | 4   | Negative                        | Negative                       | Negative                         | Negative                                     |
| Mo11      | 4   | Negative                        | Negative                       | Negative                         | Negative                                     |
| Mo12      | 4   | Negative                        | Negative                       | Negative                         | Negative                                     |
| Mo13      | 7   | Negative                        | Negative                       | Negative                         | Negative                                     |
| Mo14      | 7   | Negative                        | Negative                       | Negative                         | Negative                                     |
| Mo15      | 7   | Negative                        | 6.37*10 <sup>3</sup>           | Negative                         | Negative                                     |
| Mo16      | 10  | Negative                        | 6.3*10 <sup>3</sup>            | 5.74*10 <sup>5</sup>             | Mild meningitis                              |
| Mo17      | 10  | Negative                        | Negative                       | Negative                         | Negative                                     |
| Mo20      | 10  | Negative                        | Negative                       | 1.7*10 <sup>2</sup>              | Mild encephalitis                            |
| Mo18      | 14  | Negative                        | Negative                       | Negative                         | Negative                                     |
| Mo19      | 14  | Negative                        | Negative                       | 4.68*10 <sup>4</sup>             | Negative                                     |
| Mo21      | 14  | Negative                        | Negative                       | Negative                         | Negative                                     |
| Mo22      | 17  | Negative                        | Negative                       | Negative                         | Negative                                     |
| Mo23      | 17  | Negative                        | Negative                       | Negative                         | Negative                                     |
| Mo24      | 17  | Negative                        | Negative                       | Negative                         | Negative                                     |
| Mo25      | 21  | Negative                        | Negative                       | Negative                         | Negative                                     |
| Mo26      | 21  | Negative                        | Negative                       | Negative                         | Negative                                     |
| Mo27      | 21  | Negative                        | Negative                       | Negative                         | Negative                                     |
| Mo28      | 21  | Negative                        | Negative                       | Negative                         | Negative                                     |
| Mo1       | 21  | Negative                        | Negative                       | Negative                         | Negative                                     |
| Mo2       | 21  | Negative                        | Negative                       | Negative                         | Negative                                     |
| Mo3       | 21  | Negative                        | Negative                       | Negative                         | Negative                                     |

Clinical Score Sheet for mice inoculated with tick-borne encephalitis virus (TBEV)

Table modified according to EC-Europe Directive 2010/63/EU (2012); (Foltz et al. 1999; OECD 2000; Pope et al. 1999; Haskins, 1995; Conti et al., 2006; Gartner und Miltzer, 1993; Becker, 2017)

| Clinical score parameter severity of disorder in mice                                                                                        |   | Score |
|----------------------------------------------------------------------------------------------------------------------------------------------|---|-------|
| <b>Bodyweight</b>                                                                                                                            |   |       |
| <5% weight loss                                                                                                                              |   | 0     |
| 5-10% weight loss                                                                                                                            |   | 1     |
| 11-20 % weight loss                                                                                                                          |   | 2     |
| acute weight loss > 20% in comparison to initial weight (<24h)                                                                               | * | HEP   |
| weight loss > 25% in comparison to initial weight                                                                                            | * | HEP   |
| <b>Cardiovascular system</b>                                                                                                                 |   |       |
| normal                                                                                                                                       |   | 0     |
| pinched skin/mild enophthalmia (sunken eyes)/mild dehydration                                                                                |   | 1     |
| moderate to severe dehydration/moderate to severe ophtalmia (sunken eyes)                                                                    |   | HEP   |
| animal cold, legs and abdominal skin dark bluish                                                                                             |   | HEP   |
| <b>Coat/Skin Condition</b>                                                                                                                   |   |       |
| trimmed                                                                                                                                      |   | 0     |
| Coat slightly unkempt, mild small skin irritation                                                                                            |   | 1     |
| Slight piloerection or small lesions, moderate small skin irritation or inflammation                                                         |   | 2     |
| Marked piloerection or moderate (scale) lesions or skin inflammation                                                                         |   | 3     |
| Severe/large scale lesions, severe skin inflammation                                                                                         |   | HEP   |
| <b>Respiratory tract</b>                                                                                                                     |   |       |
| normal                                                                                                                                       |   | 0     |
| Tachypnoea (slight)                                                                                                                          |   | 1     |
| Tachypnoea (moderate)                                                                                                                        |   | 2     |
| Dyspnoea (marked) <24h                                                                                                                       |   | 3     |
| Dyspnoea (marked) >24h                                                                                                                       |   | HEP   |
| mild serous ocular or nasal discharge                                                                                                        |   | 1     |
| moderate serous to purulent ocular or nasal discharge                                                                                        |   | 2     |
| severe serous to purulent ocular or nasal discharge                                                                                          |   | 3     |
| <b>Environment</b>                                                                                                                           |   |       |
| normal                                                                                                                                       |   | 0     |
| Loose stools or diarrhoea                                                                                                                    |   | 1     |
| haemorrhagic diarrhoea                                                                                                                       |   | HEP   |
| <b>Social Behaviour/General condition/Locomotion</b>                                                                                         |   |       |
| normal                                                                                                                                       |   | 0     |
| Lack of grooming, mildly inactive (tired)                                                                                                    |   | 1     |
| Not restricted in mobility, beginning kyphosis (hunched back), mildly inactive and depressed; Reduced interaction with other animals/apathic |   | 2     |
| hunched up back (kyphosis), lethargic, isolation or hyperactive, vocalization on moving                                                      |   | 3     |
| <b>Neurological scoring</b>                                                                                                                  |   |       |
| severe kyphosis                                                                                                                              |   | HEP   |
| immobility/monibund                                                                                                                          |   | HEP   |
| <b>Neurological scoring</b>                                                                                                                  |   |       |
| normal                                                                                                                                       |   | 0     |
| mild neurological signs (e.g. head tilt, beginning ataxia, paralysis)                                                                        |   | 3     |
| moderate to severe neurological signs, ataxic, paralysis, shaking, convulsions, moving in circles                                            |   | HEP   |
| <b>Other</b>                                                                                                                                 |   |       |

| Actions                                     |                                |
|---------------------------------------------|--------------------------------|
| CS 1                                        | Review frequency of monitoring |
| CS 2                                        | ≤ 12 h frequency of monitoring |
| CS 4                                        | consult veterinarian           |
| CS 6 >48 h                                  | Implement humane endpoint      |
| CS=3 in >2 categories (highlighted in grey) | Implement humane endpoint      |
| HEP                                         | Implement humane endpoint      |

\*Im Folgenden werden die Abbruchkriterien aufgrund des Gewichtes im Detail erläutert:

1. „acute weight loss“ > 20% in comparison to initial weight“ = akuter Gewichtsverlust >20% innerhalb 24 h im Vergleich zum initialen Gewicht vor dem Versuch.
2. „weight loss > 25% in comparison to initial weight“ = Gewichtsverlust >25% im Vergleich zum initialen Gewicht vor dem Versuch (sofern Kriterium 1 „acute weight loss >20%“ innerhalb 24 h nicht zutrifft).
- Das Allgemeinbefinden der Tiere sollte ansonsten ohne besonderen Befund sein (d.h. Clinical score in weiteren Kategorien = 0). Sollte das Tier einen Gewichtsverlust zwischen >20% und 25% haben und in anderen Kategorien einen Clinical Score von ≥1, wird das Tier unverzüglich euthanasiert

**A**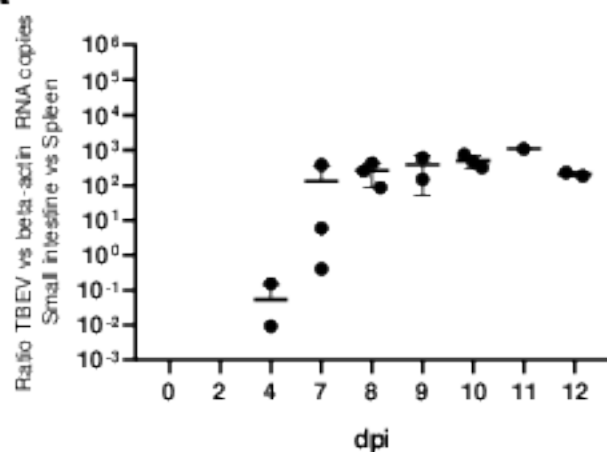**B**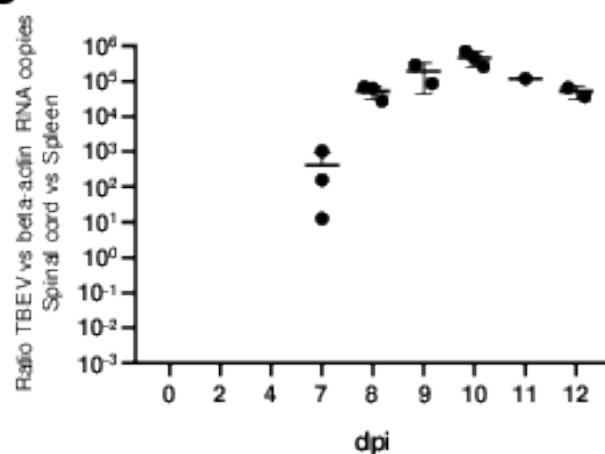**C**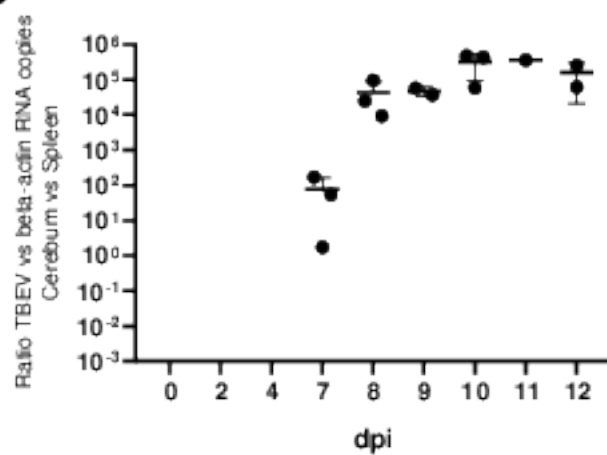**D**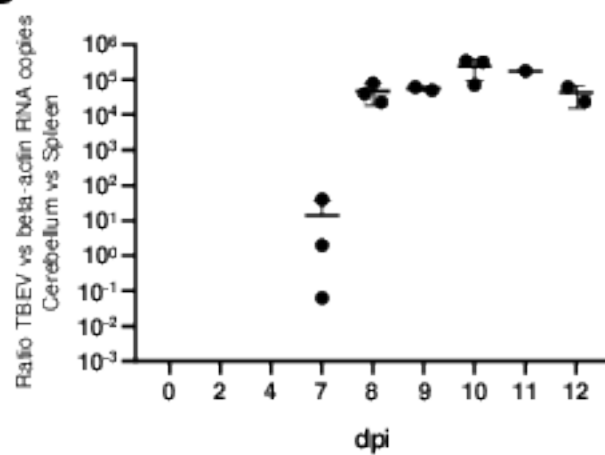

Supplement: s1 [file s1]
